# Supplementary material for: ZIF-67-derived CuCo2S4@CoS2 as an efficient bifunctional electrocatalyst for overall water splitting
Source: Royal Society of Chemistry journal article supplement (doi:10.1039/d3nj03759b), 2023-01-01
Supplement: d3nj03759b1.pdf [file d3nj03759b1.pdf]

## ZIF-67 derived $\text{CuCo}_2\text{S}_4@\text{CoS}_2$ as an efficient bifunctional electrocatalyst for Overall Water Splitting

Li-hu Qian<sup>†</sup>, Wei-wei Dong<sup>†\*</sup>, Yan-Bo Cao<sup>†</sup>, Rui Ma<sup>†</sup>, Yi Ding<sup>†</sup>, Xi Wang<sup>‡\*</sup>

<sup>†</sup> Anhui Jianzhu University, 292 Ziyun Road, Hefei, Anhui 230022, PR China

<sup>‡</sup> State Key Laboratory of Pulsed Power Laser Technology, Anhui Laboratory of Advanced Laser Technology, Electronic Countermeasure Institute, National University of Defense Technology, Hefei 230037, PR China

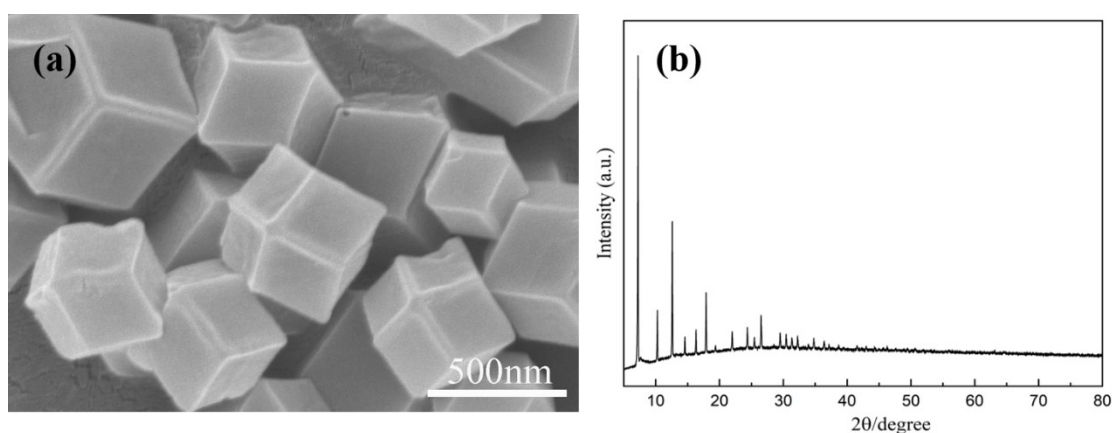

Fig S1. SEM and XRD results of the ZIF-67 template

---

\* Corresponding authors.

E-mail for Weiwei Dong: [wwdong@ahjzu.edu.cn](mailto:wwdong@ahjzu.edu.cn)

E-mail for Xi Wang: [eastangus@126.com](mailto:eastangus@126.com)

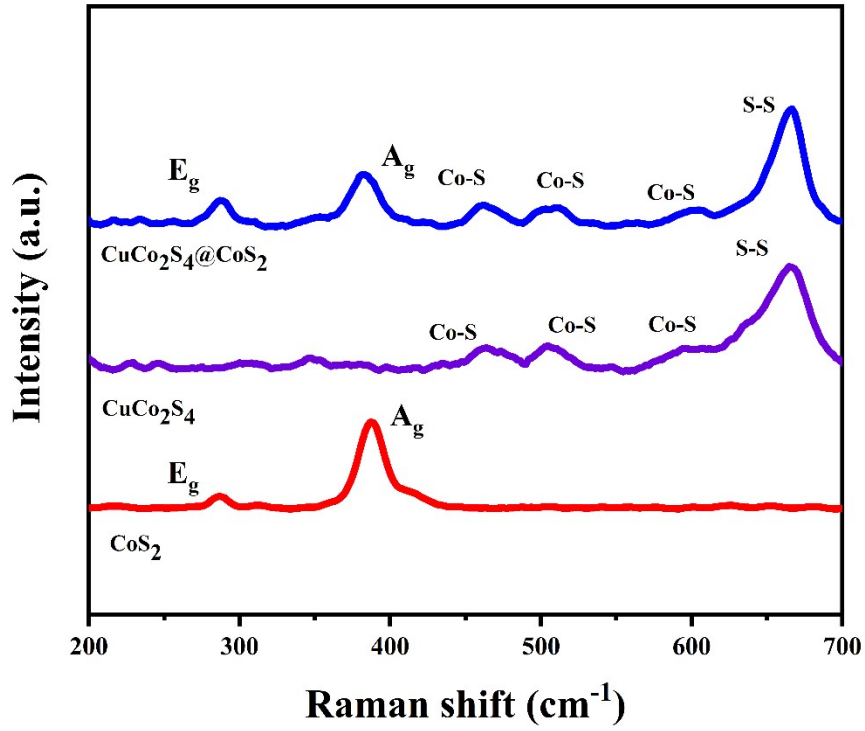

Fig S2. Raman spectra of  $\text{CoS}_2$ ,  $\text{CuCo}_2\text{S}_4$ , and  $\text{CuCo}_2\text{S}_4@/\text{CoS}_2$ .

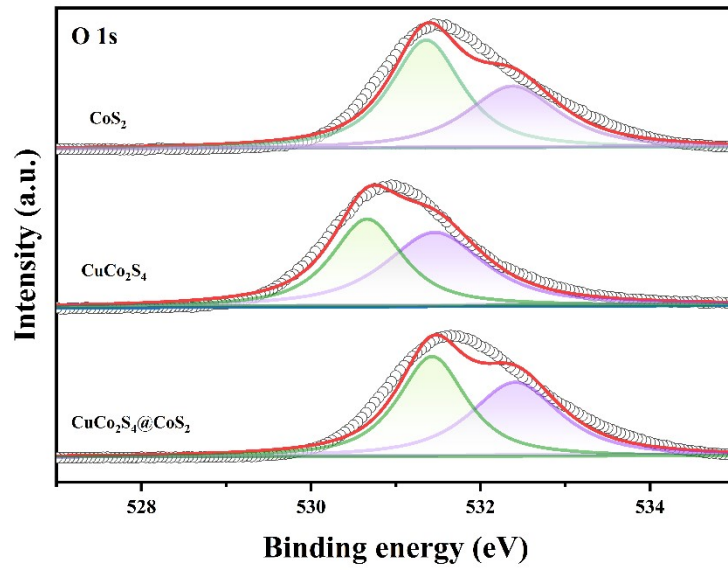

Fig S3. The O 1s XPS spectra of  $\text{CoS}_2$ ,  $\text{CuCo}_2\text{S}_4$ , and  $\text{CuCo}_2\text{S}_4@/\text{CoS}_2$ .

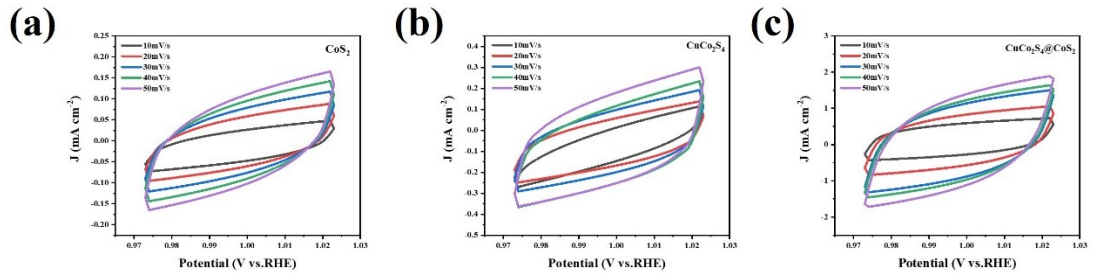

Fig S4. OER cyclic voltammety of  $\text{CoS}_2$  (a);  $\text{CuCo}_2\text{S}_4$  (b); and  $\text{CuCo}_2\text{S}_4@\text{CoS}_2$ (c).

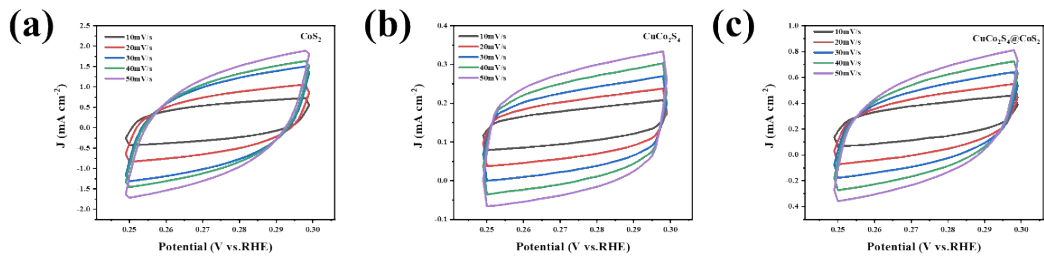

Fig S5. HER cyclic voltammety of  $\text{CoS}_2$  (a);  $\text{CuCo}_2\text{S}_4$  (b); and  $\text{CuCo}_2\text{S}_4@\text{CoS}_2$ (c).

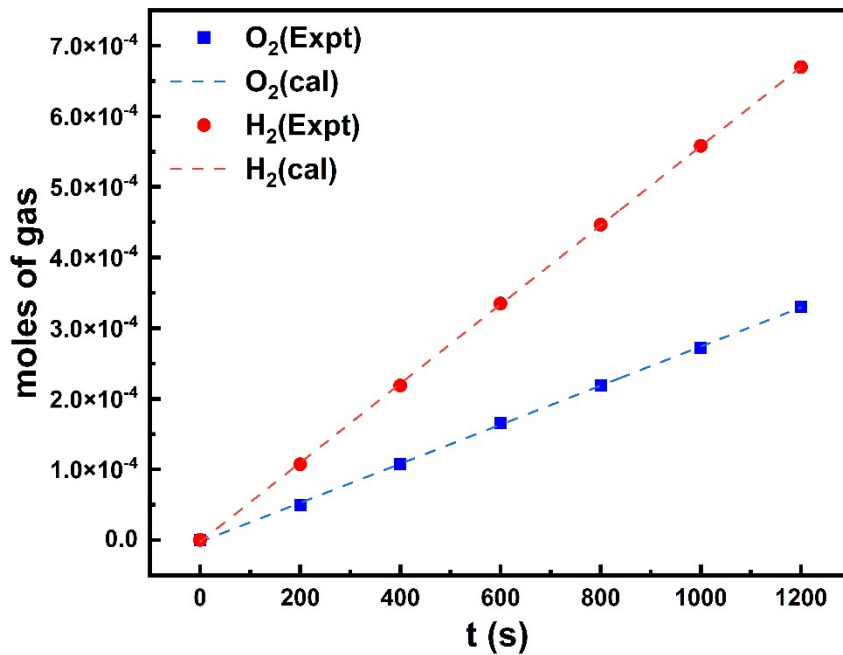

Figure S6. Faradic current efficiency for the HER and OER of the  $\text{CuCo}_2\text{S}_4@\text{CoS}_2$  electrode measured at  $110 \text{ mAcm}^{-2}$  in a  $1 \text{ M KOH}$  aqueous electrolyte using conventional water displacement. The active electrode area of the cathode and anode was  $0.9 \text{ cm}^2$ .

**Table S1.** Comparison of OER performances of CuCo<sub>2</sub>S<sub>4</sub>@CoS<sub>2</sub> with other reported electrocatalysts.

| Catalyst                                                           | $\eta_{10}$ (mV) | b (mV dec <sup>-1</sup> ) | Electrolyte | Ref.      |
|--------------------------------------------------------------------|------------------|---------------------------|-------------|-----------|
| CuCo <sub>2</sub> S <sub>4</sub> @CoS <sub>2</sub>                 | 261              | 89.2                      | 1.0 M KOH   | This work |
| Co <sub>3</sub> O <sub>4</sub> /CoS <sub>2</sub>                   | 280              | 63                        | 1.0 M KOH   | [1]       |
| CuCo <sub>2</sub> S <sub>4</sub> /NiCo <sub>2</sub> S <sub>4</sub> | 271              | 57                        | 1.0 M KOH   | [2]       |
| CoS <sub>2</sub> nanoboxes                                         | 290              | 72.2                      | 1.0 M KOH   | [3]       |
| CuCo <sub>2</sub> S <sub>4</sub> UNS                               | 269              | 41                        | 1.0 M KOH   | [4]       |
| CoO/CoS <sub>2</sub>                                               | 320              | 77                        | 1.0 M KOH   | [5]       |
| Ni-Doped CoS <sub>2</sub>                                          | 270              | 79                        | 1.0 M KOH   | [6]       |
| Ni-Fe-OH/Ni <sub>3</sub> S <sub>2</sub> /NF                        | 268              | 54                        | 1.0 M KOH   | [7]       |
| CoS <sub>2</sub> /CoS                                              | 269              | 52                        | 1.0 M KOH   | [8]       |
| CuCo <sub>2</sub> S <sub>4</sub> /Fe <sub>2</sub> O <sub>3</sub>   | 273              | 67                        | 1.0 M KOH   | [9]       |

**Table S2.** Comparison of HER performances of  $\text{CuCo}_2\text{S}_4@\text{CoS}_2$  with other reported electrocatalysts.

| Catalyst                                          | $\eta_{10}$ (mV) | $b$ (mV dec <sup>-1</sup> ) | Electrolyte | Ref.      |
|---------------------------------------------------|------------------|-----------------------------|-------------|-----------|
| $\text{CuCo}_2\text{S}_4@\text{CoS}_2$            | 153              | 151.7                       | 1.0 M KOH   | This work |
| $\text{CoS}_2/\text{MoS}_2$                       | 177              | 66                          | 1.0 M KOH   | [10]      |
| $\text{CuCo}_2\text{S}_4/\text{NiCo}_2\text{S}_4$ | 206              | 90                          | 1.0 M KOH   | [2]       |
| $\text{FeCo}_2\text{S}_4\text{-NiCo}_2\text{S}_4$ | 150              | 38                          | 1.0 M KOH   | [11]      |
| $\text{Sn-CoS}_2/\text{CC}$                       | 161              | 94                          | 1.0 M KOH   | [12]      |
| $\text{CoS}_2/\text{RGO}$                         | 180              | 90                          | 1.0 M KOH   | [13]      |
| $\text{CoS}_2@\text{Co}_3\text{O}_4$              | 320              | 42                          | 1.0 M KOH   | [14]      |
| $\text{MoS}_2/\text{NiCo}_2\text{S}_4$            | 139              | 37                          | 1.0 M KOH   | [15]      |
| $\text{CoS}_2$ HNSs                               | 193              | 100                         | 1.0 M KOH   | [16]      |

**Table S3.** Comparison of the performances for water splitting system in this work with other reported electrocatalysts.

| Catalyst                                                           | Cell voltage<br>(V, @10 mA cm <sup>-2</sup> ) | Stability (h) | Electrolyte | Ref.      |
|--------------------------------------------------------------------|-----------------------------------------------|---------------|-------------|-----------|
| CuCo <sub>2</sub> S <sub>4</sub> @CoS <sub>2</sub>                 | 1.61                                          | 20            | 1.0M KOH    | This work |
| CuCo <sub>2</sub> S <sub>4</sub> /NiCo <sub>2</sub> S <sub>4</sub> | 1.66                                          | 50            | 1.0 M KOH   | [2]       |
| CuCo <sub>2</sub> S <sub>4</sub>                                   | 1.66                                          | 24            | 1.0 M KOH   | [17]      |
| CoS <sub>2</sub> -MoS <sub>2</sub>                                 | 1.61                                          | 10            | 1.0 M KOH   | [18]      |
| Cu-CoP NAs/CP                                                      | 1.72                                          | 60            | 1.0 M KOH   | [19]      |
| Cu <sub>2</sub> S-Ni <sub>3</sub> S <sub>2</sub>                   | 1.77                                          | 100           | 1.0 M KOH   | [20]      |
| O-CoMoS                                                            | 1.6                                           | 10            | 1.0 M KOH   | [21]      |
| Co <sub>9</sub> S <sub>8</sub> @MoS <sub>2</sub>                   | 1.67                                          | 16            | 1.0 M KOH   | [22]      |
| MoS <sub>2</sub> -NiS <sub>2</sub> /NGF/NF                         | 1.64                                          | 24            | 1.0 M KOH   | [23]      |

- [1] Guo M, Xu K, Qu Y, Zeng F, Yuan C. Porous Co<sub>3</sub>O<sub>4</sub>/CoS<sub>2</sub> nanosheet-assembled hierarchical microspheres as superior electrocatalyst towards oxygen evolution reaction. *Electrochimica Acta*. 2018;268:10-9.
- [2] Ma L, Liang J, Chen T, Liu Y, Li S, Fang G. 3D CuCo<sub>2</sub>S<sub>4</sub>/NiCo<sub>2</sub>S<sub>4</sub> core-shell composites as efficient bifunctional electrocatalyst electrodes for overall water splitting. *Electrochimica Acta*. 2019;326:135002.
- [3] Guo X, Liang G, Gu A. Designed formation of CoS<sub>2</sub> nanoboxes with enhanced oxygen evolution reaction electrocatalytic properties. *International Journal of Hydrogen Energy*. 2019;44:31020-8.
- [4] Hao Z, Wei P, Yang Y, Sun J, Song Y, Guo D, et al. Self-assembled CuCo<sub>2</sub>S<sub>4</sub> nanosheets with rich surface Co<sup>3+</sup> as efficient electrocatalysts for oxygen evolution reaction. *Applied Surface Science*. 2021;536:147826.
- [5] Qin T, Ding Y, Zhang R, Gao X, Tang Z, Liu Y, et al. Bifunctional CoO/CoS<sub>2</sub> hierarchical nanospheres electrocatalyst for rechargeable Zn-Air battery. *FlatChem*. 2022;32:100343.
- [6] Xie Z, Tang H, Wang Y. MOF-Derived Ni-Doped CoS<sub>2</sub> Grown on Carbon Fiber Paper for Efficient Oxygen Evolution Reaction. *ChemElectroChem*. 2019;6:1206-12.
- [7] He W, Ren G, Li Y, Jia D, Li S, Cheng J, et al. Amorphous nickel-iron hydroxide films on nickel sulfide nanoparticles for the oxygen evolution reaction. *Catalysis Science & Technology*. 2020;10:1708-13.
- [8] Hu X, Tan P, Dong R, Jiang M, Lu L, Wang Y, et al. A Novel Metal-Organic Framework

Intermediated Synthesis of Heterogeneous CoS<sub>2</sub>/CoS Porous Nanosheets for Enhanced Oxygen Evolution Reaction. *Energy Technology*. 2021;9:2000961.

[9] Lu M, Zhang X, Tong J, Wang W, Wang Y. Enhanced Electron Transfer and Ion Transport by Binary and Multidimensional CuCo<sub>2</sub>S<sub>4</sub>/Fe<sub>2</sub>O<sub>3</sub> on Carbon Cloth for Water Oxidation. *Chemistry*. 2021;27:238-41.

[10] Su C, Xiang J, Wen F, Song L, Mu C, Xu D, et al. Microwave Synthesized Three-dimensional Hierarchical Nanostructure CoS<sub>2</sub>/MoS<sub>2</sub> Growth on Carbon Fiber Cloth: A Bifunctional Electrode for Hydrogen Evolution Reaction and Supercapacitor. *Electrochimica Acta*. 2016;212:941-9.

[11] Li D, Liu Z, Wang J, Liu B, Qin Y, Yang W, et al. Hierarchical trimetallic sulfide FeCo<sub>2</sub>S<sub>4</sub>-NiCo<sub>2</sub>S<sub>4</sub> nanosheet arrays supported on a Ti mesh: An efficient 3D bifunctional electrocatalyst for full water splitting. *Electrochimica Acta*. 2020;340:135957.

[12] Liu F, He W, Li Y, Wang F, Zhang J, Xu X, et al. Activating sulfur sites of CoS<sub>2</sub> electrocatalysts through tin doping for hydrogen evolution reaction. *Applied Surface Science*. 2021;546:149101.

[13] Yang Y, Li F, Li W, Gao W, Wen H, Li J, et al. Porous CoS<sub>2</sub> nanostructures based on ZIF-9 supported on reduced graphene oxide: Favourable electrocatalysis for hydrogen evolution reaction. *International Journal of Hydrogen Energy*. 2017;42:6665-73.

[14] Aftab U, Tahira A, Samo AH, Abro MI, Baloch MM, Kumar M, et al. Mixed CoS<sub>2</sub>@Co<sub>3</sub>O<sub>4</sub> composite material: An efficient nonprecious electrocatalyst for hydrogen evolution reaction. *International Journal of Hydrogen Energy*. 2020;45:13805-13.

[15] Sun L, Wang T, Zhang L, Sun Y, Xu K, Dai Z, et al. Mace-like hierarchical MoS<sub>2</sub>/NiCo<sub>2</sub>S<sub>4</sub> composites supported by carbon fiber paper: An efficient electrocatalyst for the hydrogen evolution reaction. *Journal of Power Sources*. 2018;377:142-50.

[16] Ma X, Zhang W, Deng Y, Zhong C, Hu W, Han X. Phase and composition controlled synthesis of cobalt sulfide hollow nanospheres for electrocatalytic water splitting. *Nanoscale*. 2018;10:4816-24.

[17] Zequine C, Bhoyate S, Wang F, Li X, Siam K, Kahol PK, et al. Effect of solvent for tailoring the nanomorphology of multinary CuCo<sub>2</sub>S<sub>4</sub> for overall water splitting and energy storage. *Journal of Alloys and Compounds*. 2019;784:1-7.

[18] Ganesan V, Kim J. Multi-shelled CoS<sub>2</sub>-MoS<sub>2</sub> hollow spheres as efficient bifunctional electrocatalysts for overall water splitting. *International Journal of Hydrogen Energy*. 2020;45:13290-9.

[19] Yan L, Zhang B, Zhu J, Li Y, Tsiakaras P, Kang Shen P. Electronic modulation of cobalt phosphide nanosheet arrays via copper doping for highly efficient neutral-pH overall water splitting. *Applied Catalysis B: Environmental*. 2020;265:118555.

[20] Bhat KS, Nagaraja HS. In Situ Synthesis of Copper Sulfide-Nickel Sulfide Arrays on Three-Dimensional Nickel Foam for Overall Water Splitting. *ChemistrySelect*. 2020;5:2455-64.

[21] Hou J, Zhang B, Li Z, Cao S, Sun Y, Wu Y, et al. Vertically Aligned Oxygenated-CoS<sub>2</sub>-MoS<sub>2</sub> Heteronanoshet Architecture from Polyoxometalate for Efficient and Stable Overall Water Splitting. *ACS Catalysis*. 2018;8:4612-21.

[22] Bai J, Meng T, Guo D, Wang S, Mao B, Cao M. Co<sub>9</sub>S<sub>8</sub>@MoS<sub>2</sub> Core-Shell Heterostructures as Trifunctional Electrocatalysts for Overall Water Splitting and Zn-Air Batteries. *ACS Appl Mater Interfaces*. 2018;10:1678-89.

[23] Kuang P, He M, Zou H, Yu J, Fan K. 0D/3D MoS<sub>2</sub>-NiS<sub>2</sub>/N-doped graphene foam composite for efficient overall water splitting. *Applied Catalysis B: Environmental*. 2019;254:15-25.
